# Supplementary material for: Temperature-tunable multiple dielectric switch in hybrid rare-earth perovskites regulated by hierarchical guest dynamics, lanthanide contraction and doping
Source: Royal Society of Chemistry journal article supplement (doi:10.1039/d4qi01243g), 2024-01-01
Supplement: d4qi01243g2.pdf [file d4qi01243g2.pdf]

## Electronic Supplementary Information

for

### **Temperature-Tunable Multiple Dielectric Switch in Hybrid Rare-Earth Perovskites Regulated by Hierarchical Guest Dynamics, Lanthanide Contraction and Doping**

Hui Xiao,<sup>a,d</sup> Lin-Yong Sheng,<sup>a,d</sup> Shuai Chen,<sup>b,d</sup> Rui-Kang Huang,<sup>\*c</sup> Cheng-Hui Zeng,<sup>a</sup> Zi-Yi Du,<sup>\*a</sup> Chun-Ting He,<sup>a</sup> Wei-Xiong Zhang<sup>\*b</sup> and Xiao-Ming Chen<sup>b</sup>

<sup>a</sup>College of Chemistry and Chemical Engineering, Jiangxi Normal University, Nanchang 330022, China

<sup>b</sup>MOE Key Laboratory of Bioinorganic and Synthetic Chemistry, GBRCE for Functional Molecular Engineering, School of Chemistry, IGCME, Sun Yat-Sen University, Guangzhou 510275, China

<sup>c</sup>Graduate School of Environmental Science, Hokkaido University, Sapporo 060-0810, Japan; Research Institute for Electronic Science (RIES), Hokkaido University, Sapporo 001-0020, Japan

<sup>d</sup>These authors contributed equally

\*Correspondence to: Zi-Yi Du, E-mail: ziyidu@gmail.com; Rui-Kang Huang, E-mail: huangrk@es.hokudai.ac.jp; Wei-Xiong Zhang, E-mail: zhangwx6@mail.sysu.edu.cn

**Table S1** The phase transition temperatures  $T_1/T_2$  (K) and thermal hystereses of **1-4** within a heating–cooling cycle recorded by DSC measurement

|          | $T_{1\text{-heating}}$ | $T_{1\text{-cooling}}$ | $\Delta T_{1\text{-hysteresis}}$ | $T_{2\text{-heating}}$ | $T_{2\text{-cooling}}$ | $\Delta T_{2\text{-hysteresis}}$ |
|----------|------------------------|------------------------|----------------------------------|------------------------|------------------------|----------------------------------|
| <b>1</b> | 282                    | 278                    | 4                                | -                      | -                      | -                                |
| <b>2</b> | 283                    | 280                    | 3                                | 258                    | 245                    | 13                               |
| <b>3</b> | 287                    | 283                    | 4                                | 229                    | 209                    | 20                               |
| <b>4</b> | 285                    | 281                    | 4                                | 206                    | 180                    | 26                               |

**Table S2** Summary of crystal data and structural refinements for **2** at three phases

|                                               |                             |                            |                             |
|-----------------------------------------------|-----------------------------|----------------------------|-----------------------------|
| Empirical formula                             | $C_{10}H_{28}N_8O_{18}CeRb$ |                            |                             |
| Formula weight                                | 773.99                      |                            |                             |
| $T$ (K)                                       | 173(2)                      | 273(2)                     | 293(2)                      |
| Phase                                         | <b>2<math>\alpha</math></b> | <b>2<math>\beta</math></b> | <b>2<math>\gamma</math></b> |
| Space group                                   | $C2/m$                      | $R\bar{3}m$                | $Fm\bar{3}m$                |
| $a$ (Å)                                       | 17.067(3)                   | 9.8698(5)                  | 14.0164(4)                  |
| $b$ (Å)                                       | 9.8843(18)                  | 9.8698(5)                  | 14.0164(4)                  |
| $c$ (Å)                                       | 9.8724(18)                  | 24.1798(16)                | 14.0164(4)                  |
| $\beta$ (deg)                                 | 125.18(2)                   | -                          | -                           |
| $V$ (Å <sup>3</sup> )                         | 1361.2(5)                   | 2039.9(2)                  | 2753.7(2)                   |
| $Z$                                           | 2                           | 3                          | 4                           |
| $D_{\text{calcd}}$ (g cm <sup>-3</sup> )      | 1.888                       | 1.890                      | 1.867                       |
| $\mu$ (mm <sup>-1</sup> )                     | 3.537                       | 3.541                      | 3.497                       |
| GOF on $F^2$                                  | 1.048                       | 1.030                      | 1.035                       |
| $R_1, wR_2$ [ $I > 2\sigma(I)$ ] <sup>a</sup> | 0.1096, 0.2942              | 0.0550, 0.1274             | 0.0351, 0.1064              |
| $R_1, wR_2$ (all data)                        | 0.1425, 0.3209              | 0.0895, 0.1458             | 0.0546, 0.1228              |

$$^a R_1 = \sum ||F_o| - |F_c|| / \sum |F_o|, wR_2 = \{ \sum w[(F_o)^2 - (F_c)^2]^2 / \sum w[(F_o)^2]^2 \}^{1/2}$$

**Table S3** Summary of crystal data and structural refinements for **1**, **3** and **4**

| Phase                                                                                             | <b>1<math>\alpha</math></b>                                         | <b>1<math>\gamma</math></b>    | <b>3<math>\gamma</math></b>                                         | <b>4<math>\gamma</math></b>                                         |
|---------------------------------------------------------------------------------------------------|---------------------------------------------------------------------|--------------------------------|---------------------------------------------------------------------|---------------------------------------------------------------------|
| Empirical formula                                                                                 | C <sub>10</sub> H <sub>28</sub> N <sub>8</sub> O <sub>18</sub> LaRb |                                | C <sub>10</sub> H <sub>28</sub> N <sub>8</sub> O <sub>18</sub> NdRb | C <sub>10</sub> H <sub>28</sub> N <sub>8</sub> O <sub>18</sub> SmRb |
| Formula weight                                                                                    | 772.52                                                              |                                | 778.08                                                              | 784.19                                                              |
| <i>T</i> (K)                                                                                      | 223(2)                                                              | 293(2)                         | 293(2)                                                              | 293(2)                                                              |
| Space group                                                                                       | <i>C2/m</i>                                                         | <i>Fm<math>\bar{3}m</math></i> | <i>Fm<math>\bar{3}m</math></i>                                      | <i>Fm<math>\bar{3}m</math></i>                                      |
| <i>a</i> (Å)                                                                                      | 16.776(10)                                                          | 14.0679(2)                     | 14.0073(3)                                                          | 13.9697(2)                                                          |
| <i>b</i> (Å)                                                                                      | 10.103(3)                                                           | 14.0679(2)                     | 14.0073(3)                                                          | 13.9697(2)                                                          |
| <i>c</i> (Å)                                                                                      | 9.529(5)                                                            | 14.0679(2)                     | 14.0073(3)                                                          | 13.9697(2)                                                          |
| $\beta$ (deg)                                                                                     | 122.57(8)                                                           | -                              | -                                                                   | -                                                                   |
| <i>V</i> (Å <sup>3</sup> )                                                                        | 1361.2(16)                                                          | 2784.1(1)                      | 2748.3(2)                                                           | 2726.2(1)                                                           |
| <i>Z</i>                                                                                          | 2                                                                   | 4                              | 4                                                                   | 4                                                                   |
| <i>D</i> <sub>calcd</sub> (g cm <sup>-3</sup> )                                                   | 1.886                                                               | 1.843                          | 1.881                                                               | 1.911                                                               |
| $\mu$ (mm <sup>-1</sup> )                                                                         | 3.434                                                               | 3.358                          | 3.737                                                               | 4.016                                                               |
| GOF on F <sup>2</sup>                                                                             | 1.099                                                               | 1.038                          | 1.156                                                               | 1.046                                                               |
| <i>R</i> <sub>1</sub> , <i>wR</i> <sub>2</sub> [ <i>I</i> > 2 $\sigma$ ( <i>I</i> )] <sup>a</sup> | 0.0787, 0.2268                                                      | 0.0518, 0.1279                 | 0.0511, 0.0881                                                      | 0.0487, 0.1270                                                      |
| <i>R</i> <sub>1</sub> , <i>wR</i> <sub>2</sub> (all data)                                         | 0.0832, 0.2324                                                      | 0.0727, 0.1395                 | 0.0530, 0.0888                                                      | 0.0631, 0.1393                                                      |

$$^a R_1 = \frac{\sum ||F_o| - |F_c||}{\sum |F_o|}, wR_2 = \left\{ \frac{\sum w[(F_o)^2 - (F_c)^2]^2}{\sum w[(F_o)^2]^2} \right\}^{1/2}$$

**Table S4** Selected bond lengths (Å) for **2** at different phases

---

| <b>2<math>\alpha</math></b> at 173 K |          |            |          |
|--------------------------------------|----------|------------|----------|
| Ce(1)–O(2)                           | 2.49(5)  | Ce(1)–O(5) | 2.54(4)  |
| Ce(1)–O(2A)                          | 2.59(2)  | Ce(1)–O(6) | 2.60(2)  |
| Ce(1)–O(6A)                          | 2.62(2)  | Rb(2)–O(3) | 2.85(3)  |
| Rb(2)–O(1)#1                         | 2.73(1)  |            |          |
| <b>2<math>\beta</math></b> at 273 K  |          |            |          |
| Ce(1)–O(3)                           | 2.59(1)  | Ce(1)–O(4) | 2.605(1) |
| Rb(2)–O(5)                           | 2.734(9) |            |          |
| <b>2<math>\gamma</math></b> at 293 K |          |            |          |
| Ce(1)–O(4)                           | 2.60(5)  | Ce(1)–O(5) | 2.66 (5) |
| Rb(2)–O(3)                           | 2.83 (2) |            |          |

---

Symmetry code: #1.  $1/2 - x, 1/2 - y, -z$ .**Table S5** Selected bond lengths (Å) for **1/3/4** at 293 K

---

| <b>1<math>\gamma</math></b> phase at 293 K |           |            |         |
|--------------------------------------------|-----------|------------|---------|
| Rb(2)–O(3)                                 | 2.83(5)   | La(1)–O(4) | 2.66(2) |
| La(1)–O(5)                                 | 2.65(2)   |            |         |
| <b>3<math>\gamma</math></b> phase at 293 K |           |            |         |
| Rb(2)–O(3)                                 | 2.836(10) | Nd(1)–O(4) | 2.55(3) |
| Nd(1)–O(5)                                 | 2.65(3)   |            |         |
| <b>4<math>\gamma</math></b> phase at 293 K |           |            |         |
| Rb(2)–O(3)                                 | 2.815(19) | Sm(1)–O(4) | 2.50(5) |
| Ce(1)–O(5)                                 | 2.65(4)   |            |         |

---

**Table S6** The fitting parameters of the Havriliak–Negami equation for **2** at a series of temperatures from 143 to 253 K

| $T$ (K) | $\tau_0$ (s)         | $\epsilon_0$ | $\epsilon_\infty$ | $\alpha$ | $\beta$ |
|---------|----------------------|--------------|-------------------|----------|---------|
| 143     | $8.9 \times 10^{-4}$ | 3.26         | 2.54              | 0.14     | 1.0     |
| 153     | $3.4 \times 10^{-4}$ | 3.41         | 2.54              | 0.16     | 1.0     |
| 163     | $1.3 \times 10^{-4}$ | 3.59         | 2.55              | 0.19     | 1.0     |
| 173     | $5.6 \times 10^{-5}$ | 3.80         | 2.55              | 0.21     | 1.0     |
| 183     | $2.6 \times 10^{-5}$ | 4.03         | 2.56              | 0.23     | 1.0     |
| 193     | $1.2 \times 10^{-5}$ | 4.24         | 2.57              | 0.23     | 1.0     |
| 203     | $5.9 \times 10^{-6}$ | 4.47         | 2.60              | 0.22     | 1.0     |
| 213     | $3.3 \times 10^{-6}$ | 4.70         | 2.60              | 0.17     | 0.89    |
| 223     | $2.3 \times 10^{-6}$ | 4.89         | 2.60              | 0.12     | 0.78    |
| 233     | $1.5 \times 10^{-6}$ | 5.11         | 2.60              | 0.09     | 0.70    |
| 243     | $9.0 \times 10^{-7}$ | 5.41         | 2.60              | 0.05     | 0.63    |
| 253     | $5.2 \times 10^{-7}$ | 5.74         | 2.61              | 0.02     | 0.58    |

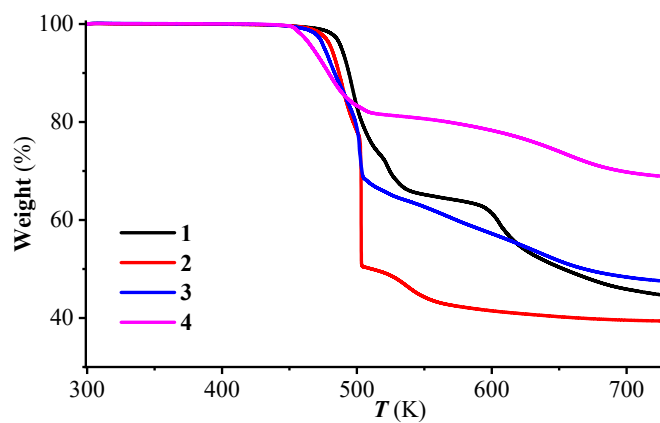

**Fig. S1** TGA curves of 1-4.

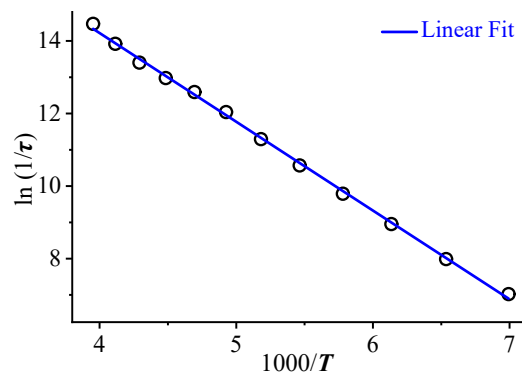

**Fig. S2** Arrhenius plots of the relaxation time  $\tau$  as a function of inverse temperature for **2**.

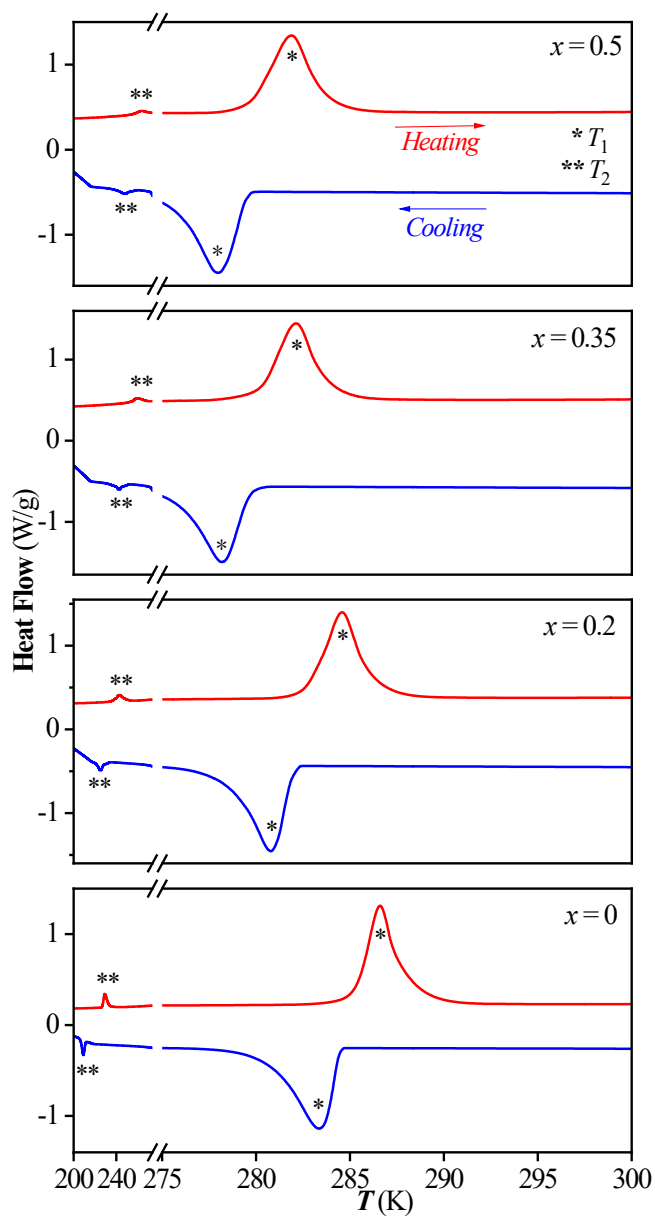

**Fig. S3** DSC measurement of  $(i\text{-PrNHMe}_2)_2[\text{Rb}(\text{La}_x\text{Nd}_{1-x})(\text{NO}_3)_6]$  in a heating-cooling cycle.

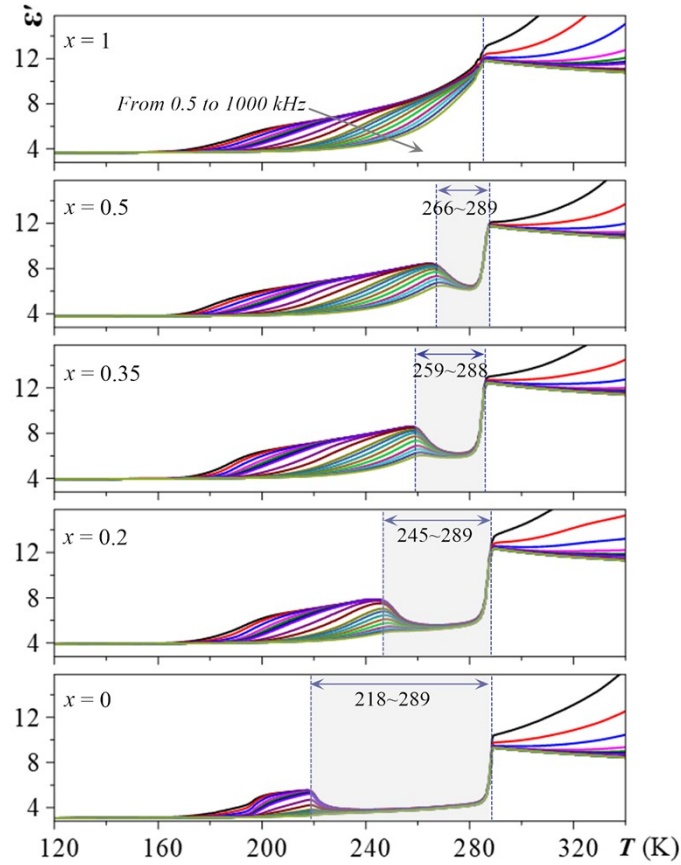

**Fig. S4** Comparison of the temperature-dependent multiple dielectric switches of 1/3 and their solid solutions  $(i\text{-PrNHMe}_2)_2[\text{Rb}(\text{La}_x\text{Nd}_{1-x})(\text{NO}_3)_6]$  at various ac frequencies. For display detail, see Fig. 3.

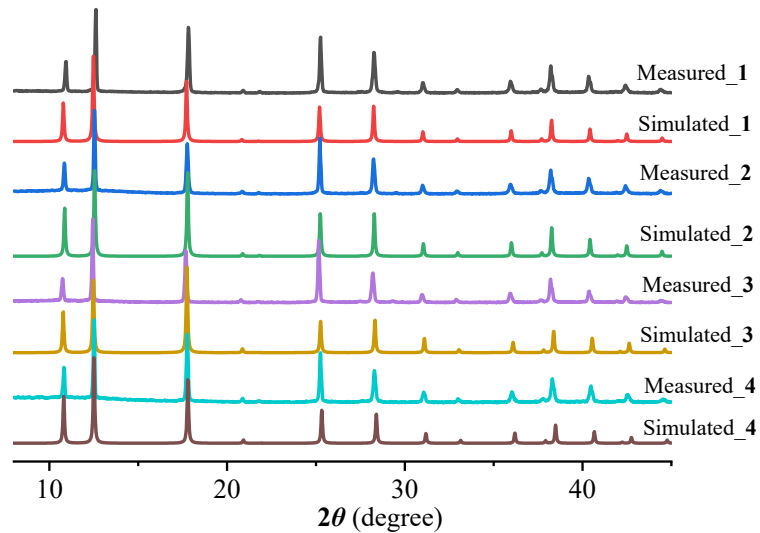

**Fig. S5** Simulated and experimental PXRD patterns for 1-4 at room temperature.

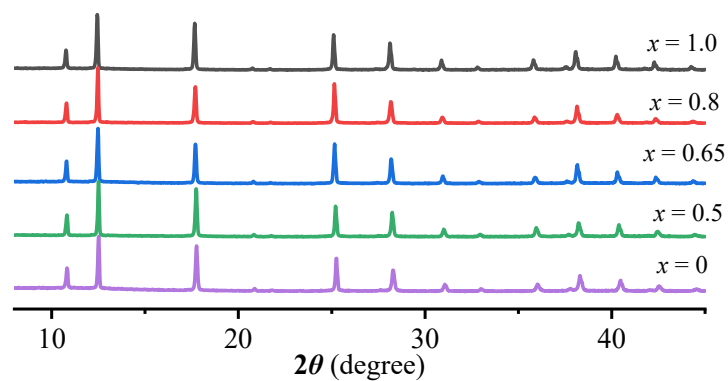

**Fig. S6** Comparison of the experimental PXRD patterns of  $(i\text{-PrNHMe}_2)_2[\text{Rb}(\text{La}_x\text{Nd}_{1-x})(\text{NO}_3)_6]$  at room temperature.

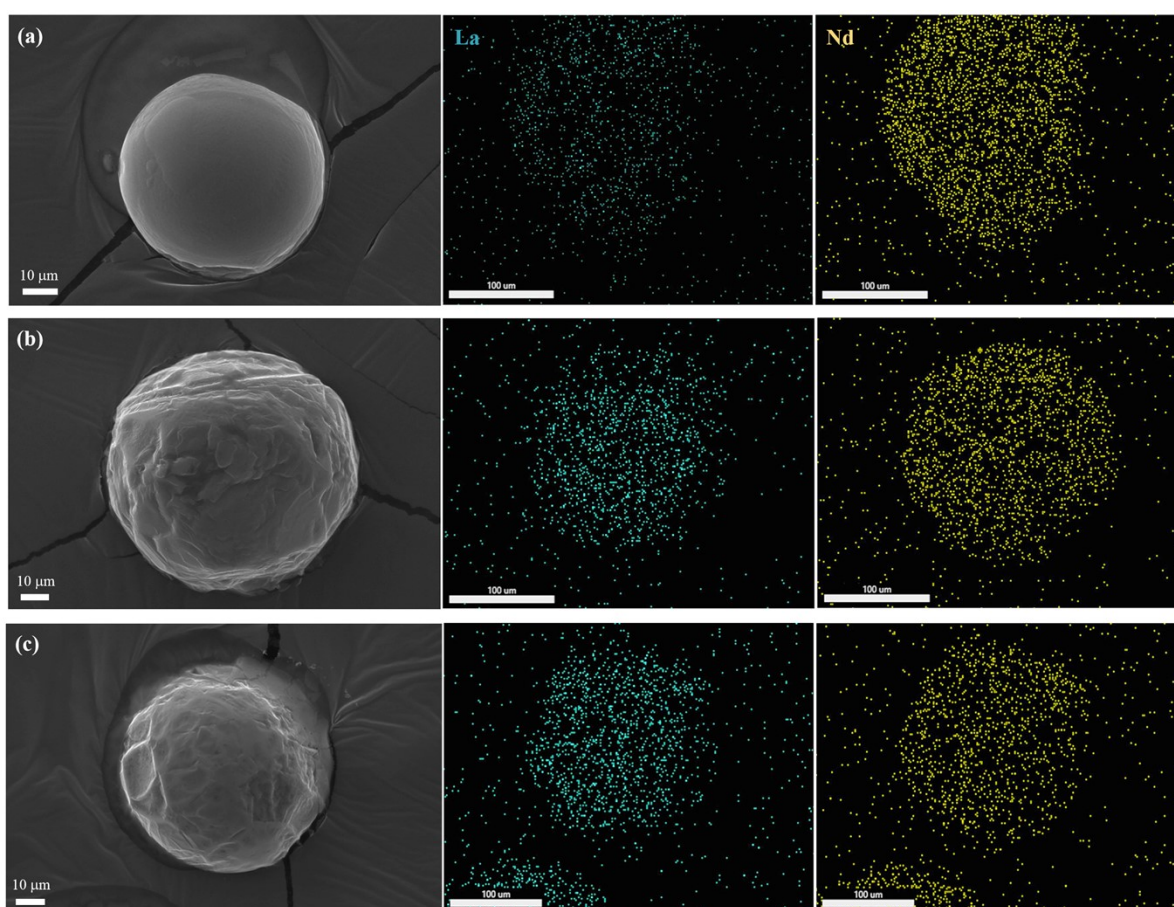

**Fig. S7** SEM images and corresponding EDS elemental mapping of La/Nd in the molecular solid solutions  $(i\text{-PrNHMe}_2)_2[\text{Rb}(\text{La}_x\text{Nd}_{1-x})(\text{NO}_3)_6]$ , where  $x = 0.2$  (a),  $0.35$  (b) and  $0.5$  (c), respectively.



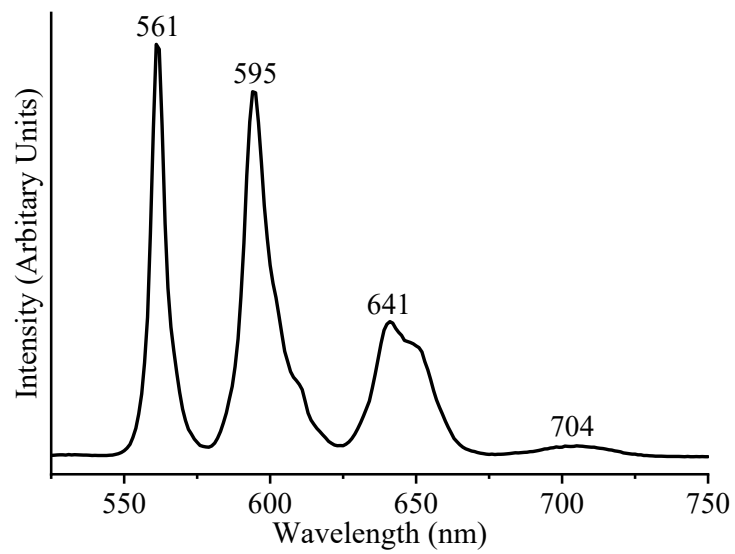

**Fig. S8** Solid-state emission spectrum of **4**.
